# Supplementary material
Source: PubMed Central journal article supplement (PMC4331262)

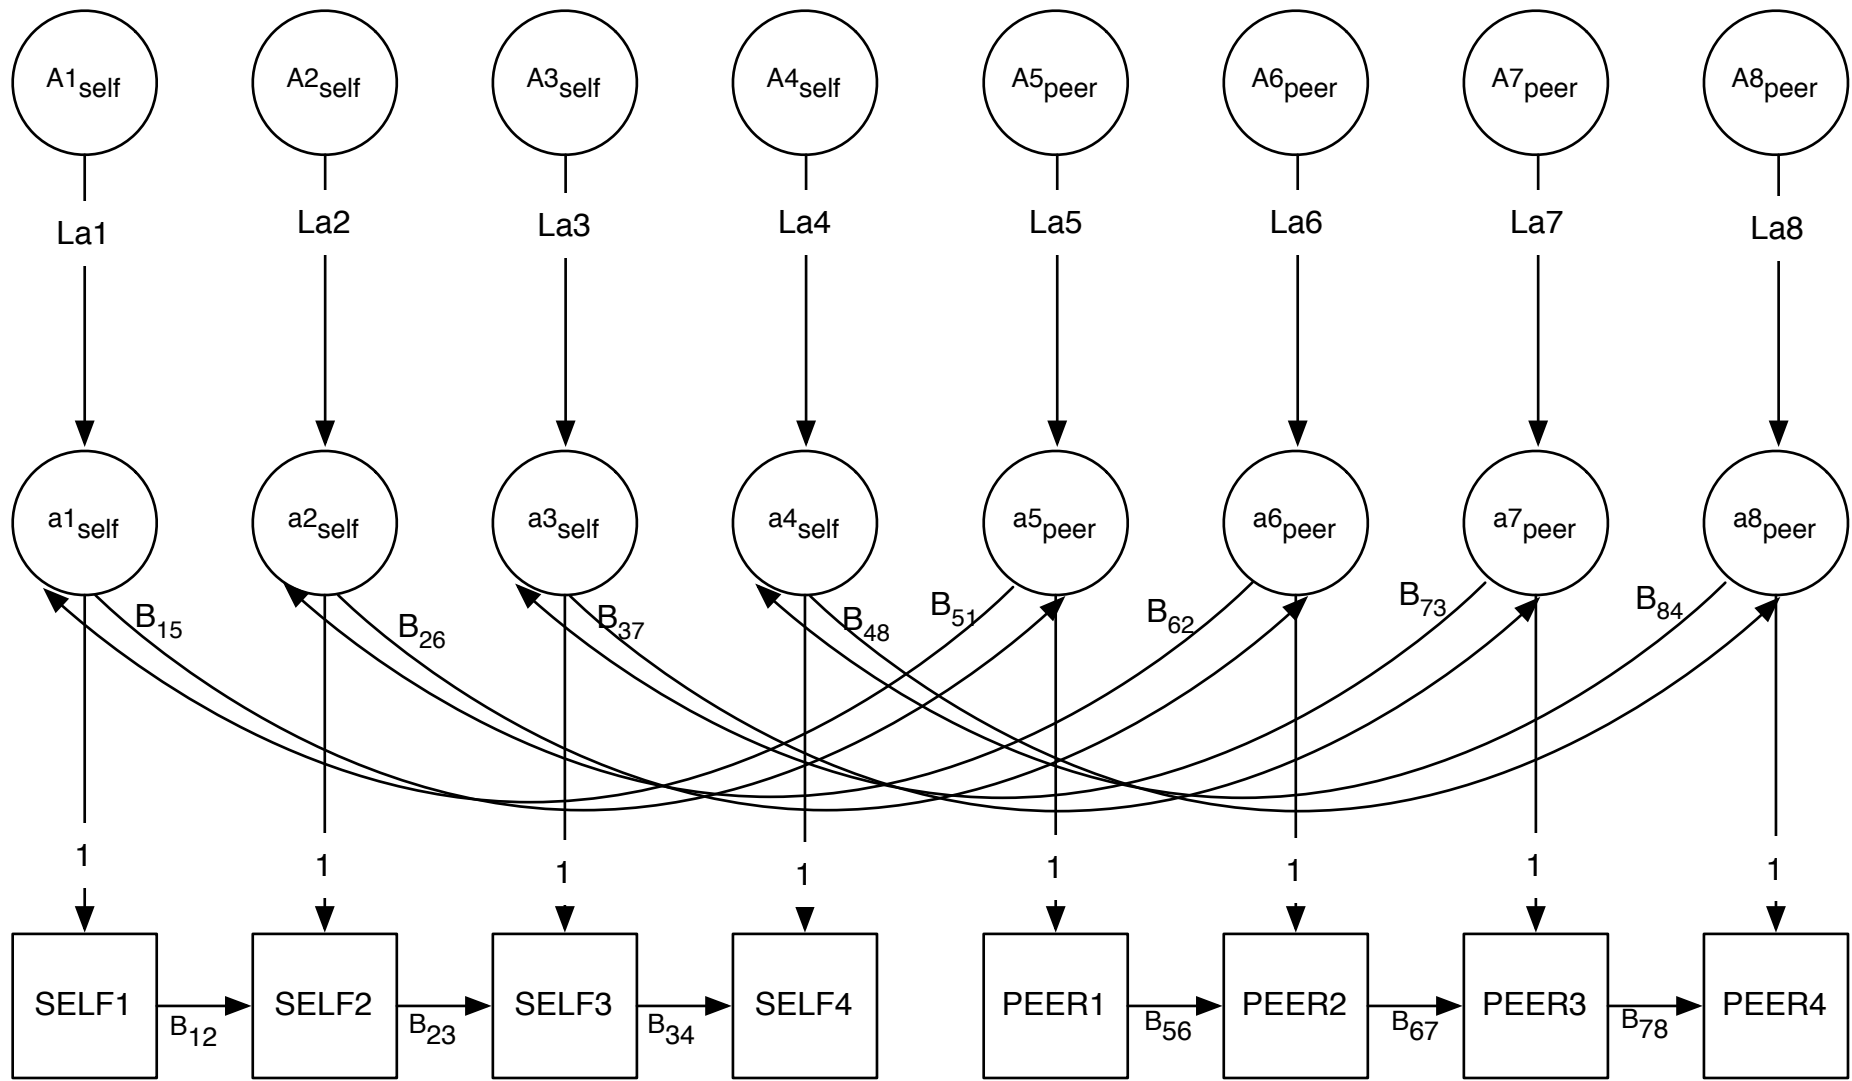

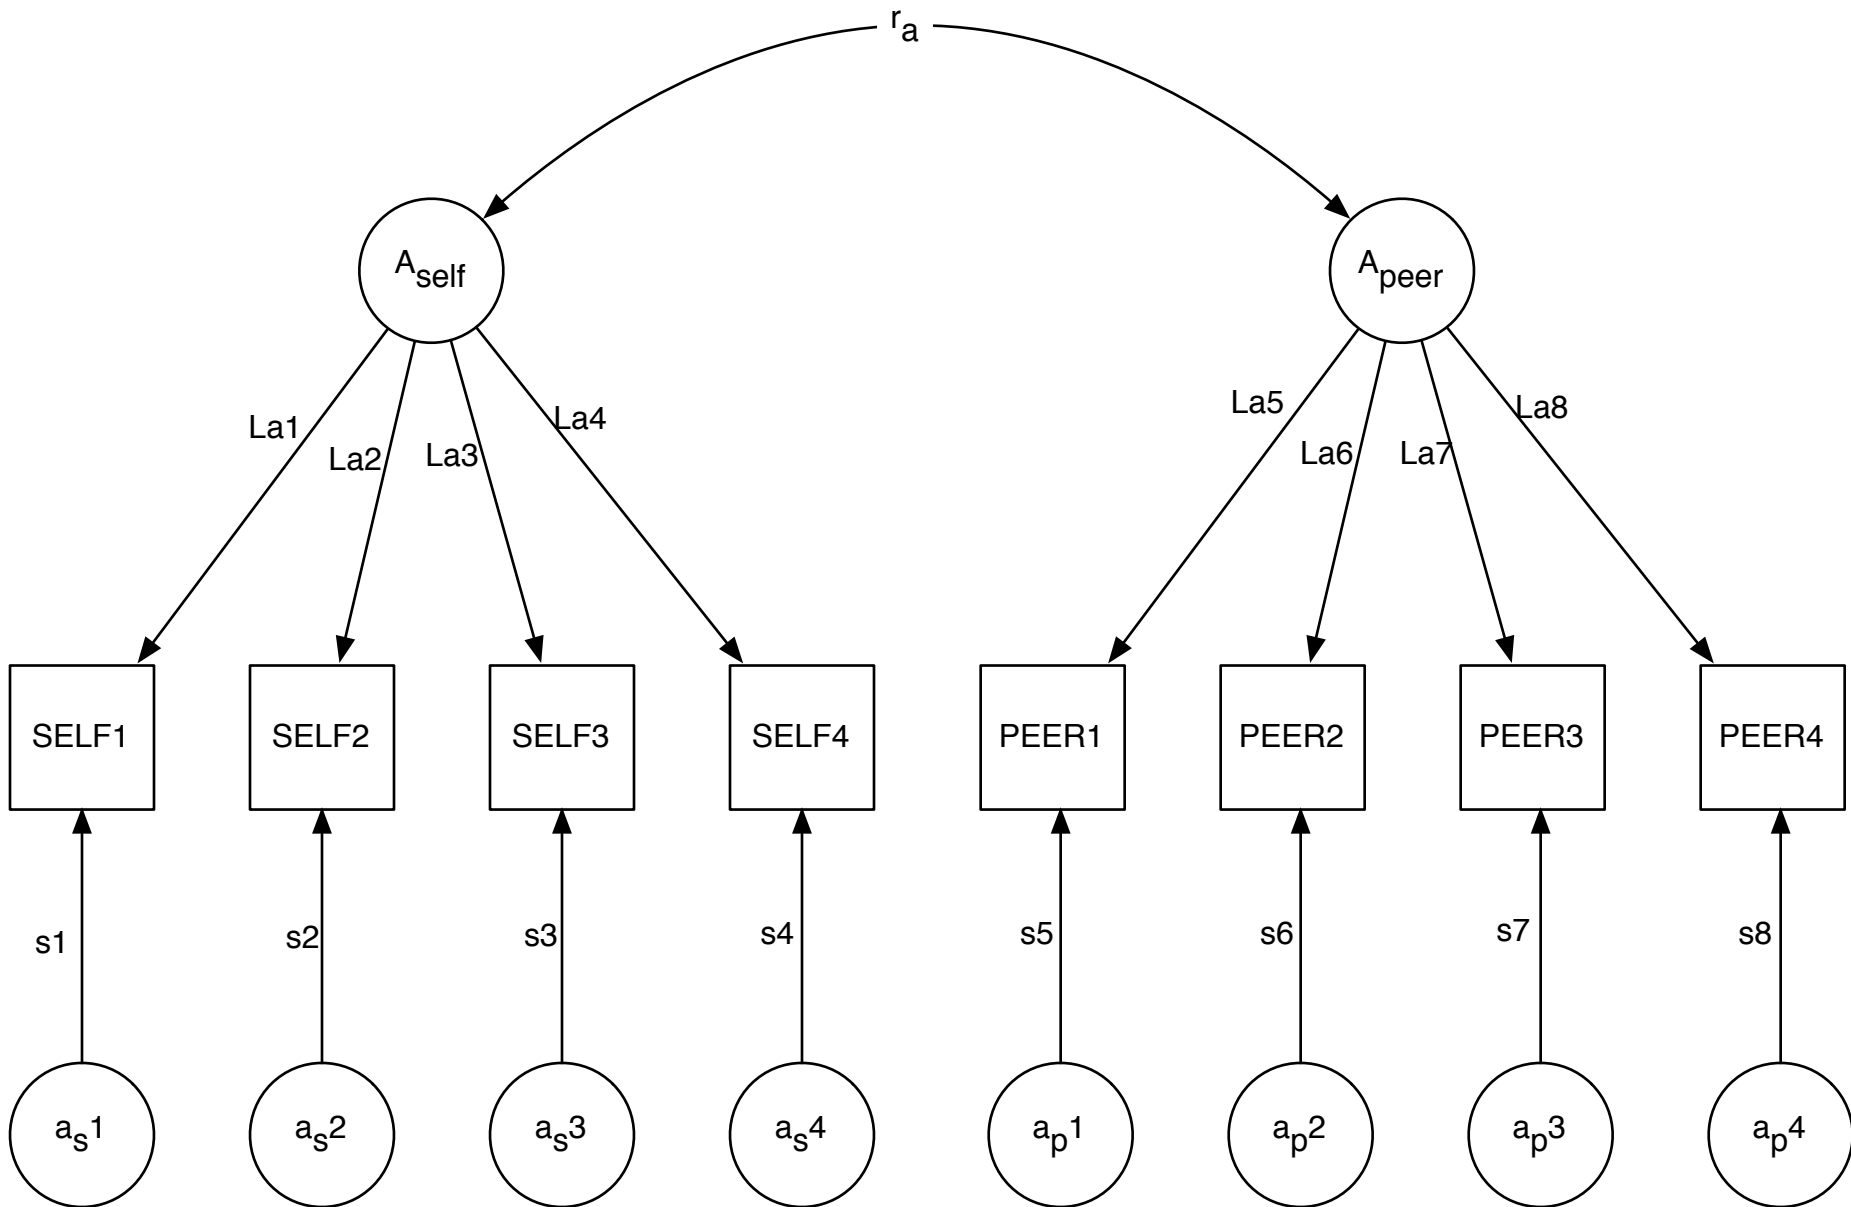

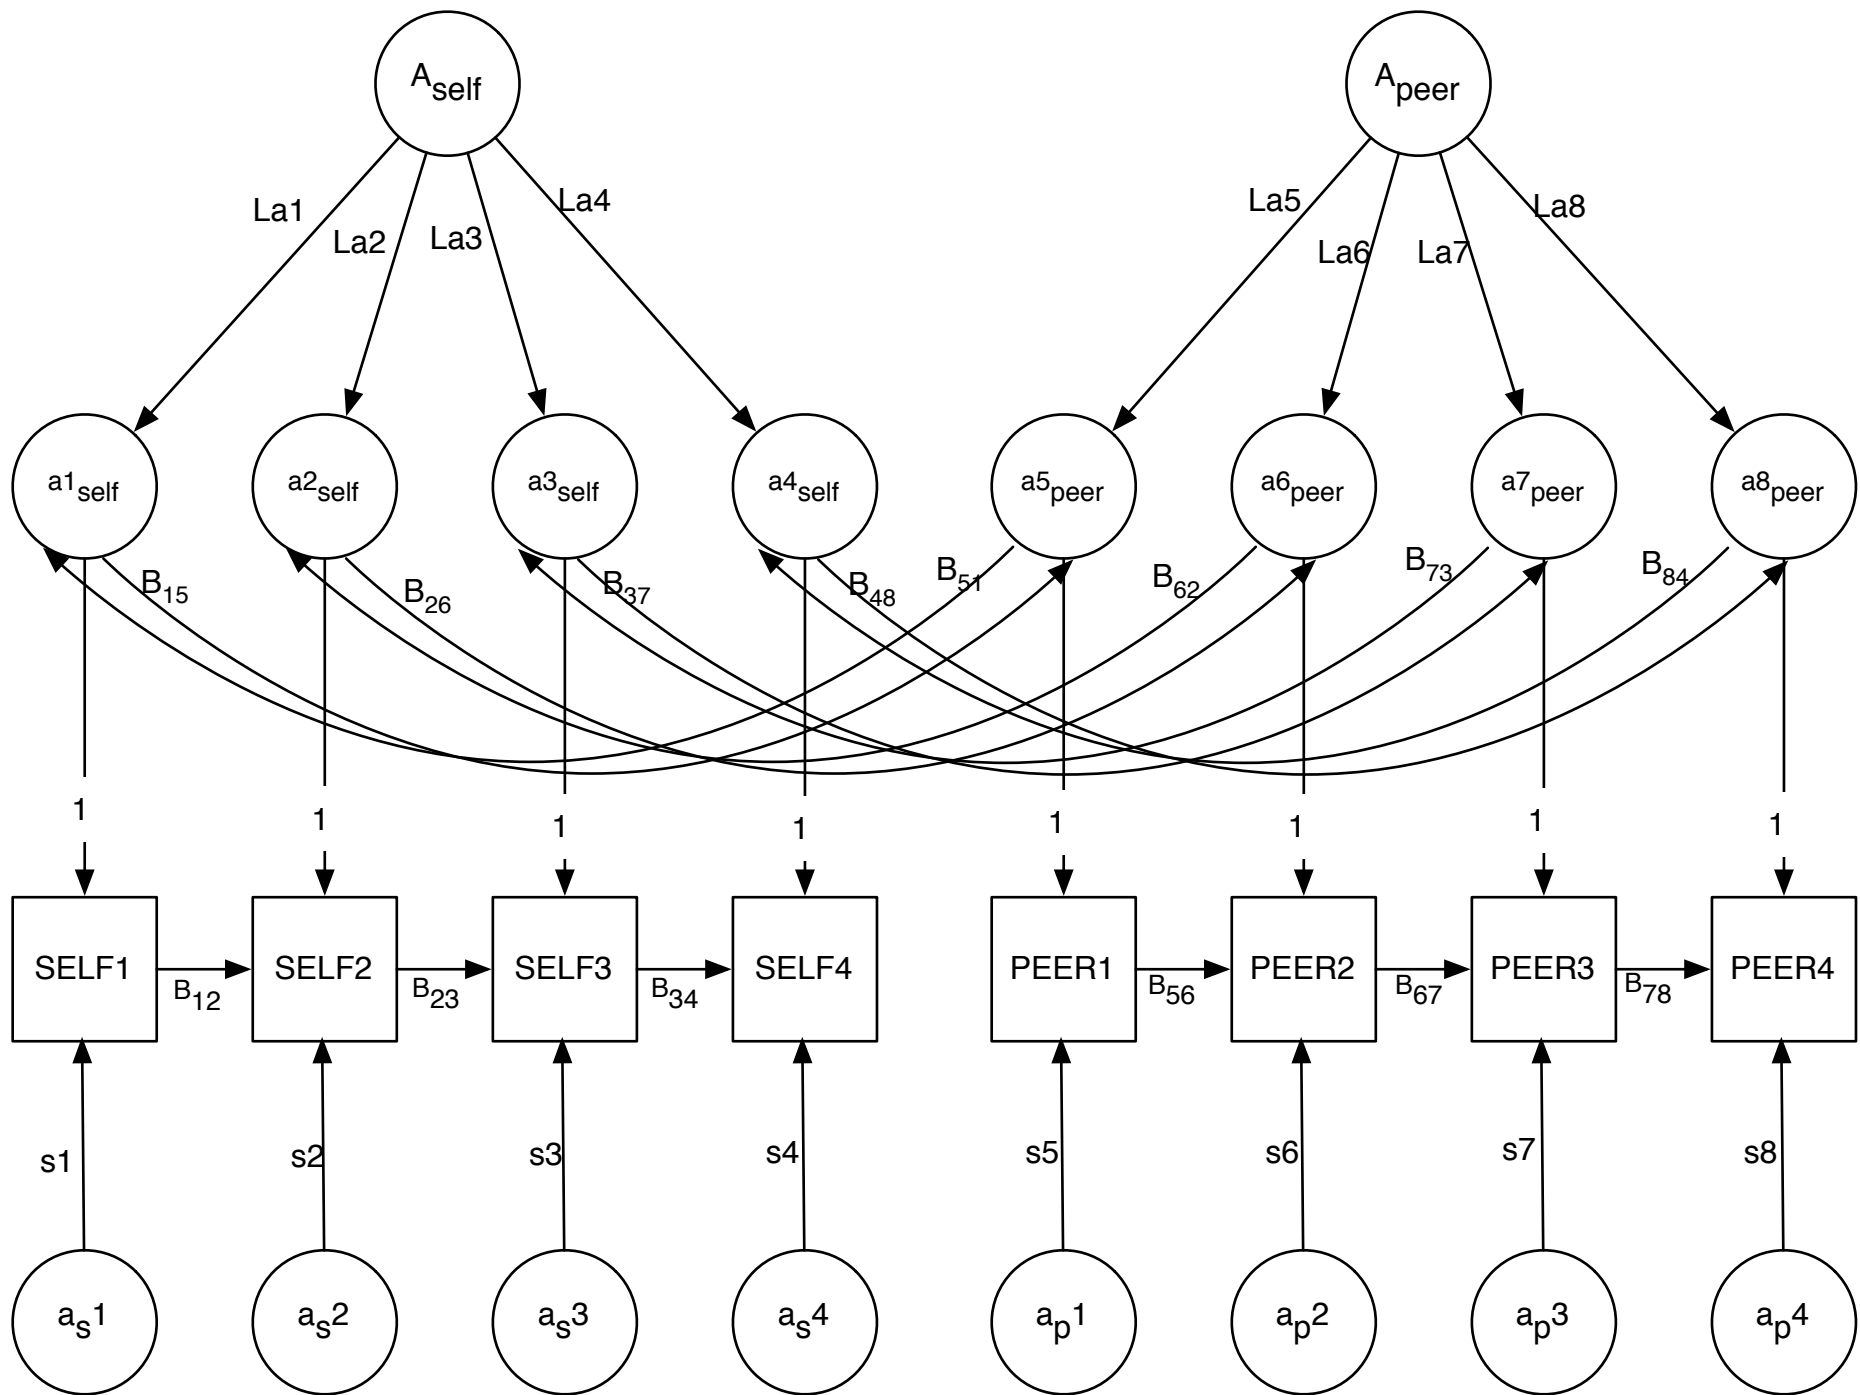

Supplement: NIHMS641821-supplement-Supp_FigureS1.pdf [file NIHMS641821-supplement-Supp_FigureS1.pdf]
